# Supplementary material
Source: PubMed Central journal article supplement (PMC7164782)
Supplement: mmc1.pdf [file mmc1.pdf]

## Supplementary webappendix

This webappendix formed part of the original submission and has been peer reviewed. We post it as supplied by the authors.

Supplement to: Aslanabadi A, Ghabili K, Shad K, Khalili M, Sajadi MM. Emergence of whooping cough: notes from three early epidemics in Persia. *Lancet Infect Dis* 2015; published online Aug 20. [http://dx.doi.org/10.1016/S1473-3099\(15\)00292-3](http://dx.doi.org/10.1016/S1473-3099(15)00292-3).



اینوی بهار دایم جمبله را سوده بلعاب تخم کتان برشند و جها پازند مقدار خود  
 و باید دانست که سرفه و نزله از امراض دارده است همچو رمد و جبهه و آبله و سرفه بمخاطبه از هوای  
 تری قزاقی افتد از هوای عفن نیز گاهی بدیدی آید بسبب شغز روح و شش از هوا  
 پستق عفن و مس چندین نوبت این مشاهد کرده ام در هر آه دو نوبت هوا پستی  
 اندک پیدا کرده بود و مولد سرفه عام شده بی نزله و بمرتب بود و سرفه که منقطع نشدی  
 تا قی بنامی و ضعف نکردی و اطفال بهوش میشدند و بسیار مردم کو جکت و تبرک  
 بهین غشی و زور سرفه هلاک شدند در کت اول آخر الامرز نجیل خام سوده در آب کرم  
 حکیمی هندی فرمود که آتش میدند هر روز یکمقال و پشته و اکثر بدین علاج صحت یابند  
 و در کت دوم کرم دند و بهار بود و علاج بقصد و تلین و بخوردن زنجبیل سوده و بلع  
 مکی شهادت در دهن گرفتن هلیله و بیخ مخ و جوز بواد و ارچنی و نمک طبر و زه و پوست  
 نار شیرین شها و در آب آن فرودن و بعضی عها پزله و خوردن غذایا تر یا ساق  
 غلیظ و کم تریشته بدتی بدید واقع میشد و مردم مرا این سرفه واقع شد و علاجهای  
 مقدم و سابق کجینی شد در دو ماه و تا نقل هوا نکردیم م تفع نشد در ری غلامی  
 هر کس صفادی مزاج را در زمستان سرفه کنه فایزی نشویشی مید او جنانچه شب خواب  
 نتوانستی کردن و از میسکات نزله و حذرات گاهی میخورد و غذایا سوره و منفی  
 نیکو نمی یافت او را مدت خوردن انار میخوشش با پروهای آن فرمودم و بهین صحت یافت  
 و چند کس دیگر انار میخوشش را در شب آتش می کجند و میخوردند صحت یافتند و در آن فایز  
 هوا اندک لغفی داشت کنیزی را سرفه شدی جنانچه در تعفن مقدم گفته شد حضرت او را  
 کباب الشا پیوشش ساختند و شبها روز بهی غذا و آب بدوند و بعد دو شبان روز  
 قدری شربت غسل بدوند و غذای نرم و چون تمام حاضر شد سرفه شکین تا یافته بود و علاج  
 قوی دیگر محتاج نشد و چندین کس را دیدم که چته سرفهای کهنه بر چال پیش کردند و اع کوه کجانی



پشم نرم که سفید را نبرد و دوزخ داده پوسیده بر سینه او می بندد و در هر گاه نفس او را گرم دارند  
تا هوای خشک بعضی او نرسد و از سخن کردن این منع کنند و متضج عناب و مغز بادام و مغز بادام  
را عظیم نافع آید و ماشش برنج با شیر بادام و اوان بسی مفید بود و وجهه کم خوابی شیر خشک  
بغایه نافع آید طفل و کودکی را همچنین رشته بادام ماشش و بادام و ملحا مهای خشک  
چون شکر ملا و کیلانی و مرغ کباب و نان و حلوا می مغزی سرفه ترکودگان زمانا نافع آید و همچنین  
حبالتها ~~شکر~~ در دهن داشتن و شکر و نار جیل با هم کوفته گاهی خوردند و گزای بکین که برک  
مورد دارد در دهن نگاه داشتن که گزای بسیار نافع آید بشرط کم گفتن و در او ادرست  
سندست و لغتایه در هوای رمی سرفه متولد شد و اطفال و کودگان را چنان بود که چون سرفه  
کردی تا قی شدی و ضعف کردی سرفه تکین یافتی و چنان درد در سینه ایشان گرفت  
که طفلان ریزه دست بر سینه خود نهادند می و ناله می و بعضی ازین معالجات مذکور کرده  
و بعضی زیاده در ایشان بید نمی آید جهت بعضی موانع و بسیار لطیف غذا می کردند و نیز  
خشک و اثری نیک ظاهر نمی شد بلکه گاه بود که غذا می غلیظ بهتر می آمد و بعضی هلاکت  
نزدیک شد یکی فرمود که حبه سفید که در میان سیاه می چشم که سفید است بگیرند و خشک سازند  
و با نبات سخی کنند و در شیر مضمحل کنند و بر ناستا یکی یاد و از آن حبه بهمنند و در شب نگاه  
همین این تدبیر بغایت نافع آید بدو پس روز صحت می یافتند و پرهیز نمی کردند و بسیار  
مدین علاج نیک شد و کودگان چهار پنج ساله را در بگری فرمود که بوقت خواب مقدار باقلا  
مرکبی بود دفعه و سه دفعه بلع کردند و سحر کاسی حلوا می مغز بادام جوز میخوردند و باندک روزی  
ازین مرض فرزند خلاص شدند و بعضی را از لقب سرفه آمدی و پرهیز نیک کردند و آن  
حوادثت ماده نفع میکرد و منع می نمود و لعوق بحران ~~صحت~~ پیکر دهند و صحت می یافتند از  
و سرفه و بعضی را آب پیاز پخته یک قاشوق هر صباح بخاستا میدادند و سینه او را  
میداشتند و پشم دود داده می نهادند بهین صحت یافتند و اکثر این علاجات بهرابت تجربه
